# Supplementary material
Source: PubMed Central journal article supplement (PMC3291796)
Supplement: NIHMS323395-supplement-Supp_Fig_S1-S2___Supp_Material.pdf [file NIHMS323395-supplement-Supp_Fig_S1-S2___Supp_Material.pdf]

## Supplementary Information

### The probabilistic interpretation of the regularization parameter $\lambda$

**Ridge regression.** Here, we derive the (known) result that if (1) the coefficients  $\beta_j$  are normally distributed with variance  $\tau^2$ , i.e.  $\beta \sim N(0, \tau^2 \mathbf{I})$ , and (2) that the training data  $y_i$  are contaminated with Gaussian noise of variance  $\sigma^2$ , i.e.  $\mathbf{y} \sim N(\mathbf{X}\beta, \sigma^2 \mathbf{I})$ , then the problem of finding the maximum likelihood fit is equivalent to regularization by ridge regression, with  $\lambda = \sigma^2/\tau^2$ .

The log-likelihood of obtaining the training data  $\mathbf{y}$  from this model is

$$\log P(\mathbf{y}|\sigma, \tau, \beta) = N \log \left( \frac{1}{\sqrt{\pi\sigma^2}} \right) + K \log \left( \frac{1}{\sqrt{\pi\tau^2}} \right) - \sum_i^N \frac{(y_i - \sum_j X_{ij}\beta_j)^2}{2\sigma^2} - \sum_j^K \frac{\beta_j^2}{2\tau^2}$$

The maximum likelihood  $\hat{\beta}$  can be found by applying Bayes' identity

$$P(\beta|\sigma, \tau, \mathbf{y}) \propto \frac{P(\mathbf{y}|\sigma, \tau, \beta)}{P(\mathbf{y})}$$

and setting

$$\begin{aligned} \frac{\partial \log P(\beta|\sigma, \tau, \mathbf{y})}{\partial \beta} &= 0 \\ \frac{\partial}{\partial \beta} \left( - \sum_i^N \frac{(y_i - \sum_j X_{ij}\beta_j)^2}{2\sigma^2} - \sum_j^K \frac{\beta_j^2}{2\tau^2} \right) &= 0 \\ \frac{\partial}{\partial \beta} \left( \sum_i^N (y_i - \sum_j X_{ij}\beta_j)^2 + \frac{\sigma^2}{\tau^2} \sum_j^K \beta_j^2 \right) &= 0 \end{aligned}$$

This is equivalent to finding the  $\beta$  that minimizes  $(\mathbf{y} - \mathbf{X}\beta)^T(\mathbf{y} - \mathbf{X}\beta) + \lambda\beta^T\beta$ , where  $\lambda = \sigma^2/\tau^2$ .

**Lasso regression.** If the  $\beta_j$  are distributed as  $\beta_j \sim \frac{1}{2\tau^2} \exp(-\frac{|\beta_j|}{\tau^2})$ , then the problem of finding the maximum likelihood fit is equivalent to regularization by lasso regression, with  $\lambda = \sigma^2/\tau^2$ . The log-likelihood of obtaining the training data  $\mathbf{y}$  from this model is

$$\log P(\beta|\mathbf{y}, \sigma, \tau) = N \log \left( \frac{1}{\sqrt{\pi\sigma^2}} \right) + K \log \left( \frac{1}{2\tau^2} \right) - \sum_i \frac{(y_i - \sum_j X_{ij}\beta_j)^2}{2\sigma^2} - \sum_j \frac{|\beta_j|}{\tau^2}$$

and the maximum likelihood  $\hat{\beta}$  can be found by setting

$$\frac{\partial}{\partial \beta} \left( \sum_i \frac{1}{2} (y_i - \sum_j X_{ij}\beta_j)^2 + \frac{\sigma^2}{\tau^2} \sum_j |\beta_j| \right) = 0$$

**Elastic net regression.** If the  $\beta_j$  are distributed as  $\beta_j \sim P(\beta_j) = A(\tau, \rho) \exp(-\rho\frac{\beta_j^2}{2\tau^2} - (1-\rho)\frac{|\beta_j|}{\tau^2})$ , where  $\rho$  is a mixing parameter and  $A(\tau, \rho)$  is the normalization constant that makes  $\int P(\beta_j)d\beta_j = 1$ , then the problem of finding the maximum likelihood fit is equivalent to regularization by elastic net regression, with  $\lambda = \sigma^2/\tau^2$ . The log-likelihood of obtaining the training data  $\mathbf{y}$  from this model is

$$\begin{aligned} \log P(\beta|\mathbf{y}, \sigma, \tau) = & N \log \left( \frac{1}{\sqrt{\pi\sigma^2}} \right) + K \log \left( \sqrt{\frac{\pi}{2\rho}} \tau \right) + K (\gamma^2 + \log(1 + \text{Erf}(\gamma))) \\ & - \sum_i \frac{(y_i - \sum_j X_{ij}\beta_j)^2}{2\sigma^2} - \sum_j \rho \frac{\beta_j^2}{2\tau^2} - \sum_j (1-\rho) \frac{|\beta_j|}{\tau^2} \end{aligned}$$

where  $\gamma \equiv \frac{\rho-1}{\sqrt{2\rho\tau^2}}$ . The maximum likelihood  $\hat{\beta}$  in this case can be found by setting

$$\frac{\partial}{\partial \beta} \left( \sum_i^N \frac{1}{2} (y_i - \sum_j X_{ij} \beta_j)^2 + \frac{\sigma^2}{\tau^2} \sum_j^K |\beta_j| + \frac{\sigma^2}{2\tau^2} \sum_j^K \beta_j^2 \right) = 0$$

## Standardizing of input data

Here we mention an important property of ridge, lasso and elastic regression: the results of the regression are not invariant to scaling of the training data, i.e. scaling or translating the training data  $\mathbf{y}$  will non-trivially influence the effects of the regularization penalty. Thus, in practice, it is a good idea to *standardize* the input data by some method before calculating rate spectra. If the time series has a non-zero baseline (i.e.  $y(t)$  does not go to zero as  $t \rightarrow \infty$ ), a typical procedure would be to eliminate this degree of freedom by “centering” the data. First, assuming that  $\beta_K$  corresponds to  $k_K = 0$ , one can estimate  $\beta_K$  directly by  $\bar{y} = \frac{1}{N} \sum_i y_i$ . Then, for the remaining  $\beta_j$ ,  $j = 1, \dots, K-1$ ,  $\bar{y}$  is subtracted from each  $y_i$ , and the regressor inputs  $X_{ij}$  are replaced by  $X_{ij} - (1/N) \sum_i X_{ij}$ . ( $\mathbf{X}$  now being a  $(N+K-1) \times K-1$  matrix.) This prevents the baseline from being penalized by the regularization procedure.

For the purposes of computing rate spectra, however, the centering procedure is not robust. We find that  $\bar{y}$  is not always an accurate estimate of  $\beta_K$ , depending on the form of the input data. Instead, simply scaling the input data  $y_i$  to the interval  $[0, 1]$ , and including  $\beta_K$  in the regression, gives better results. While the baseline is still penalized by regularization, the effect is negligible, especially when spectrum includes many other rates  $k_j$  near zero.

## Rate spectra for stretched-exponential functions

The analytical solution for the (continuous) rate spectrum  $H_\gamma(k)$ , is given by two equivalent formulae [10]:

$$H_\gamma(k) = \frac{\tau_0}{\pi} \int_0^\infty \exp(-k\tau_0 u) \exp[-u^\gamma \cos(\gamma\pi)] \sin[u^\gamma \sin(\gamma\pi)] du \quad (9)$$

whose numerical computation works well for large values of  $k$ , and

$$H_\gamma(k) = \frac{\tau_0}{\pi} \int_0^\infty \exp[-u^\gamma \cos(\frac{\gamma\pi}{2})] \cos[u^\gamma \sin(\frac{\gamma\pi}{2} - k\tau_0 u)] du \quad (10)$$

which works well for small values of  $k$ .

Both derivations proceed from the Bromwich integral

$$H(K) = \lim_{\epsilon \rightarrow 0} \frac{1}{2\pi} \int_{\epsilon - i\infty}^{\epsilon + i\infty} I(T) e^{KT} dT$$

where  $I(T) = \exp(-T^\beta)$ , and  $T = t/\tau_0$ . Equation (9) proceeds from complex inversion integral by defining a special contour [15], while Equation (10) proceeds from a contour integration [16].

## Supplementary Figures

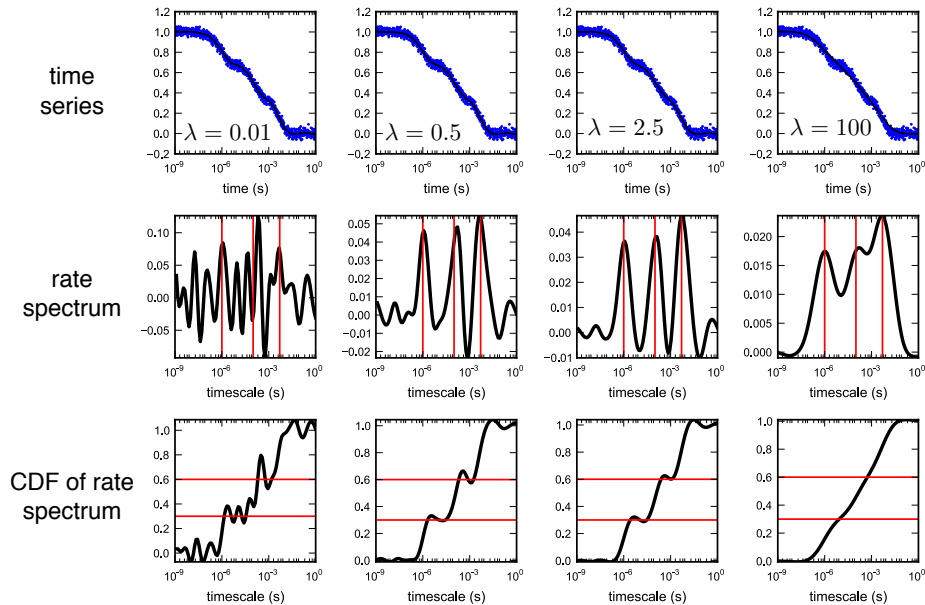

Figure S1: **The effects of regularization (using ridge regression) on a noisy tri-exponential dataset.** Artificial noise  $N(0, s^2)$ ,  $s = 0.025$  was added to 1000 samples of a tri-exponential time series with time constants  $(\tau_1, \tau_2, \tau_3) = (10^{-6}s, 10^{-4}s, 5 \times 10^{-3}s)$ , and amplitudes (respectively) of  $(\alpha_1, \alpha_2, \alpha_3) = (0.3, 0.3, 0.4)$ . Columns show the results for  $\lambda = 0.01, 0.5, 2.5$  and 100: (top) a noisy data set (blue) with best-fit time traces  $\hat{y}$ , (middle) the calculated rate spectrum (red lines for each  $\tau_i$ ), and (bottom) the cumulative distribution of rate amplitudes (with red lines indicated the cumulative amplitudes of each relaxation). For small values of  $\lambda$  (0.01), the spectrum is only weakly regularized, resulting in a spectrum heavily affected by noise. For larger values of  $\lambda$  (0.5, 2.5), three peaks corresponding to each timescale in the data is recovered. For very large values of  $\lambda$  (100), the rate spectrum is broadened, although in this case, the three timescales are still discernible.

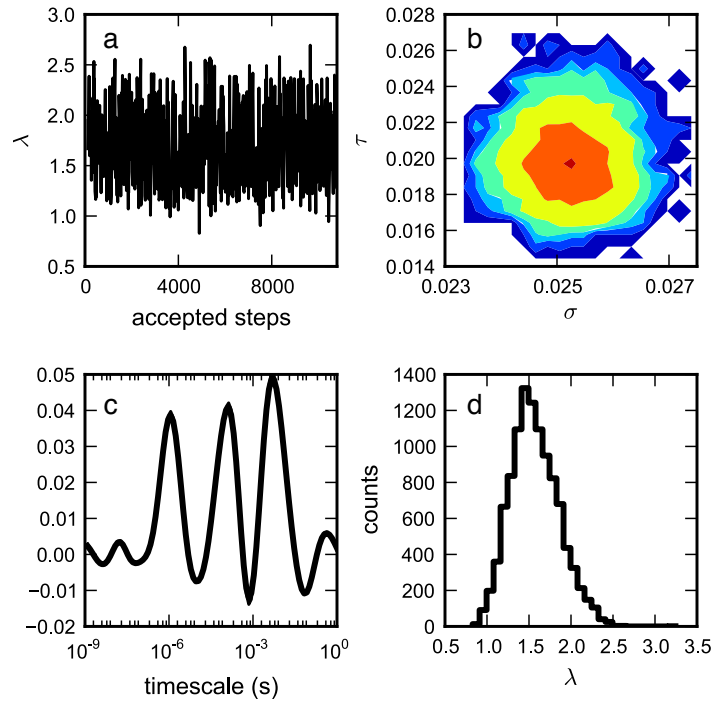

Figure S2: **Posterior sampling of the regularization parameter  $\lambda$ .** Ridge regression was performed for the tri-exponential data with added noise ( $s = 0.05$ ). (a) Monte Carlo sampling of the posterior in  $\sigma$  and  $\tau$  produces a converged trajectory of values  $\lambda = \sigma^2/\tau^2$ . (b) A contour plot of  $(\sigma, \tau)$  counts (contours from blue to red: 1, 2, 5, 10, 25, 100, 250, 500). (c) The rate spectrum calculated as the expectation over all posterior samples. (d) The posterior distribution of  $P(\lambda|\mathbf{y})$ , as calculated from posterior sampling.
